1 **Title**

2 Roq1 confers resistance to *Xanthomonas*, *Pseudomonas syringae* and *Ralstonia solanacearum*  
3 in tomato

4

5 **Authors**

6 Nicholas C. Thomas<sup>1,2</sup>, Connor G. Hendrich<sup>3</sup>, Upinder S. Gill<sup>4</sup>, Caitilyn Allen<sup>3</sup>, Samuel F. Hutton<sup>4</sup>,

7 \*Alex Schultink<sup>1,2</sup>

8

9 **Affiliations**

10 1. Fortiphyte Inc., 2151 Berkeley Way, Berkeley, CA 94704

11 2. Innovative Genomics Institute, University of California, Berkeley, CA 94720

12 3. Department of Plant Pathology, University of Wisconsin – Madison, Madison, WI 53706, USA

13 4. University of Florida, IFAS, Gulf Coast Research and Education Center, Wimauma, FL, USA

14 **Author contributions<sup>1</sup>**

15 **Funding information<sup>2</sup>**

16 **Corresponding author contact<sup>3</sup>**

17

---

<sup>1</sup> N.C.T. and A.S. wrote the manuscript and performed *Pseudomonas* and *Ralstonia* petiole infection assays. A.S. carried out *Xanthomonas* infection and *Agrobacterium* transient expression experiments. U.S.G. and S.F.H. performed *Xanthomonas* field experiments. C.G.H. constructed the *Ralstonia* knockout and performed *Ralstonia* soil soak assays, supervised by C.A. All authors analyzed results, edited and approved the manuscript.

<sup>2</sup>This work was supported in part by the National Institute of Food and Agriculture, US Department of Agriculture under award number 2016-67012-25106 and the UC Berkeley Innovative Genomics Institute. CGH was supported by an NSF Predoctoral Fellowship.

<sup>3</sup> Alex Schultink, [aschult@berkeley.edu](mailto:aschult@berkeley.edu)

18

## 19 **Summary**

20 A single immune receptor expressed in tomato confers strong resistance to three  
21 different bacterial diseases.

22

## 23 **Abstract**

24 *Xanthomonas* species, *Pseudomonas syringae* and *Ralstonia solanacearum* are bacterial plant  
25 pathogens that cause significant yield loss in many crop species. Current control methods for  
26 these pathogens are insufficient but there is significant potential for generating new disease-  
27 resistant crop varieties. Plant immune receptors encoded by nucleotide-binding, leucine-rich  
28 repeat (NLR) genes typically confer resistance to pathogens that produce a cognate elicitor,  
29 often an effector protein secreted by the pathogen to promote virulence. The diverse sequence  
30 and presence / absence variation of pathogen effector proteins within and between pathogen  
31 species usually limits the utility of a single NLR gene to protecting a plant from a single  
32 pathogen species or particular strains. The NLR protein Recognition of XopQ 1 (Roq1) was  
33 recently identified from the plant *Nicotiana benthamiana* and mediates perception of the effector  
34 proteins XopQ and HopQ1 from *Xanthomonas* and *P. syringae* respectively. Unlike most  
35 recognized effectors, alleles of XopQ/HopQ1 are highly conserved and present in most plant  
36 pathogenic strains of *Xanthomonas* and *P. syringae*. A homolog of XopQ/HopQ1, named RipB,  
37 is present in many *R. solanacearum* strains. We found that Roq1 also mediates perception of  
38 RipB and confers immunity to *Xanthomonas*, *P. syringae*, and *R. solanacearum* when  
39 expressed in tomato. Strong resistance to *Xanthomonas perforans* was observed in three  
40 seasons of field trials with both natural and artificial inoculation. The *Roq1* gene can therefore  
41 be used to provide safe, economical and effective control of these pathogens in tomato and  
42 other crop species and reduce or eliminate the need for traditional chemical controls.

43

44 **Main**

45 Bacterial pathogens from the species *Pseudomonas syringae*, *Ralstonia solanacearum*, and the  
46 genus *Xanthomonas* can infect many different crop species and inflict significant yield losses  
47 when environmental conditions favor disease. *Xanthomonas* and *P. syringae* tend to enter plant  
48 stem, leaf, or flower tissue through wounds or natural openings, such as stomata or  
49 hydathodes, whereas *R. solanacearum* is soilborne, entering roots through wounds and natural  
50 openings before colonizing xylem tissue (Vasse, Frey, and Trigalet 1995; Gudesblat, Torres,  
51 and Vojnov 2009). Once inside the host these bacteria manipulate host metabolism and  
52 suppress plant immunity using multiple strategies, including effector proteins delivered by the  
53 type III secretion system (Kay and Bonas 2009; Peeters et al. 2013; Xin, Kvitko, and He 2018).  
54 This enables the pathogens to multiply to high titers while the plant tissue is still alive and  
55 showing few or no visual symptoms. Once the bacteria reach high populations they typically  
56 cause necrosis of infected leaf tissue or wilting and eventual death of the plant.  
57 Effective control measures for bacterial pathogens are relatively limited, particularly once plants  
58 become infected (Davis et al. 2013). Soil fumigation can reduce *R. solanacearum* populations in  
59 the soil but this is expensive, potentially hazardous to workers and the environment, and of  
60 limited efficacy (Yuliar, Nion, and Toyota 2015). Copper sulfate and antibiotics such as  
61 streptomycin have been used to control *Xanthomonas* species and *P. syringae* but have  
62 adverse environmental impacts and many strains have evolved tolerance to these chemicals  
63 (Kennelly et al. 2007; Griffin et al. 2017). Applying chemicals that induce systemic acquired  
64 resistance, such as acibenzolar-S-methyl, can provide partial control but increase production  
65 cost and can depress crop yields when used repeatedly (Pontes et al. 2016).  
66 The most effective, economical, and safe way to control bacterial pathogens is to plant crop  
67 varieties that are immune to the target pathogen (Jones et al. 2014; Vincelli 2016). Such

68 immunity is often mediated by plant immune receptor genes. Plants have large families of cell  
69 surface and intracellular immune receptor proteins that surveil for the presence of invading  
70 pathogens (Zipfel 2014; Jones, Vance, and Dangl 2016). Effector proteins delivered by the  
71 bacterial type III secretion system are common ligands for intracellular plant immune receptors  
72 encoded by intracellular nucleotide-binding domain and leucine-rich repeat containing (NLR)  
73 genes (X. Li, Kapos, and Zhang 2015; Jones, Vance, and Dangl 2016; Kapos, Devendrakumar,  
74 and Li 2019). While effector proteins contribute to virulence on a susceptible host, an immune  
75 response is activated in the plant if that plant has the cognate receptor to recognize the effector.  
76 NLR genes typically confer strong, dominant resistance to pathogens that deliver the cognate  
77 recognized effector protein (Jones and Dangl 2006; Boller and He 2009; Deslandes and Rivas  
78 2012; X. Li, Kapos, and Zhang 2015). Disease-resistant plants can be generated by identifying  
79 the appropriate plant immune receptor genes and transferring them into the target crop species  
80 (Dangl, Horvath, and Staskawicz 2013).

81 We recently identified the *Nicotiana benthamiana* immune receptor gene named *Recognition of*  
82 *XopQ 1 (Roq1)*, which appears to be restricted to the genus *Nicotiana* and is required for  
83 resistance to *Xanthomonas spp.* and *P. syringae* (Schultink et al. 2017). *Roq1* is a  
84 Toll/Interleukin-1 Receptor (TIR) NLR immune receptor that mediates recognition of the  
85 *Xanthomonas* effector protein XopQ and the homologous effector HopQ1 from *P. syringae*.  
86 XopQ is present in most species and strains of *Xanthomonas* (Ryan et al. 2011) and HopQ1 is  
87 present in 62% (290 of 467) sequenced putative pathogenic *P. syringae* strains (Dillon et al.  
88 2019). XopQ/HopQ1 has homology to nucleoside hydrolases and has been shown to enhance  
89 virulence on susceptible hosts (Ferrante and Scortichini 2009; W. Li et al. 2013), possibly by  
90 altering cytokinin levels or interfering with the activity of host 14-3-3 proteins (W. Li et al. 2013;  
91 Giska et al. 2013; Teper et al. 2014; Hann et al. 2014). The conservation of XopQ/HopQ1 and  
92 their importance in virulence suggests that *Roq1* has widespread potential to confer resistance  
93 to these pathogens in diverse crop species. Indeed, transient expression assays demonstrated

94 that *Roq1* can recognize XopQ/HopQ1 alleles from *Xanthomonas* and *P. syringae* pathogens of  
95 tomato, pepper, rice, citrus, cassava, brassica, and bean (Schultink et al. 2017). However, it  
96 was not known if *Roq1* can confer disease resistance when expressed in a crop plant.

97 Tomato is one of the most important vegetable crops and is highly susceptible to several  
98 bacterial diseases. Bacterial spot, bacterial speck and bacterial wilt of tomato are caused by  
99 *Xanthomonas* species, *P. syringae* pv. *tomato* and *R. solanacearum*, respectively. These  
100 diseases are difficult to control, especially if the pathogens become established in a field and  
101 environmental conditions favor disease (Rivard et al. 2012; Potnis et al. 2015). Tomato breeding  
102 germplasm has only limited resistance against these diseases and in some cases linkage drag  
103 has complicated introgression of resistance genes from wild relatives (Sharma and Bhattarai  
104 2019). *R. solanacearum* contains a homolog of XopQ/HopQ1 called RipB, suggesting that  
105 expressing *Roq1* in tomato could also confer resistance to bacterial wilt. Like XopQ/HopQ1 in  
106 *Xanthomonas* and *P. syringae*, RipB is highly conserved in most *R. solanacearum* isolates  
107 (Sabbagh et al. 2019). Here we present laboratory and field data showing that *Roq1* confers  
108 resistance against these three pathogens in tomato and that this resistance depends on the  
109 presence of the cognate pathogen effector.

110

## 111 **Results**

### 112 **Tomatoes expressing *Roq1* are resistant to *Xanthomonas* and *P. syringae***

113 We generated homozygous tomato plants expressing the *Roq1* gene from *N. benthamiana* and  
114 tested them for resistance to *Xanthomonas* and *P. syringae* by measuring bacterial growth *in*  
115 *planta*. Population sizes of wild-type *X. perforans* strain 4B and *X. euvesicatoria* strain 85-10  
116 were approximately 100-fold smaller in tomatoes expressing *Roq1* compared to wild-type  
117 tomatoes at six days post inoculation (Fig. 1). In contrast, XopQ deletion mutants multiplied  
118 equally well in leaves of both wild-type and *Roq1* tomato. Disease symptoms begin as small

119 water-soaked lesions and progress to necrosis of infected tissue. Wild-type *X. perforans* and *X.*  
120 *euvesicatoria* caused severe disease symptoms on wild-type tomato plants but failed to cause  
121 visible symptoms on *Roq1* plants (Fig. 2). The *XopQ* mutants caused similar disease symptoms  
122 on both wild-type and *Roq1* tomato. Similar results were observed for *P. syringae* DC3000 and  
123 its HopQ1 mutant (Fig. 1, 2) and a Race 1 isolate of *P. syringae* pv. *tomato* (Supplementary Fig.  
124 1).

125

### 126 **Expression of *Roq1* confers resistance to *Xanthomonas perforans* in the field**

127 To determine if the resistance observed in growth chamber experiments would hold up under  
128 commercial tomato production conditions, we tested the ability of *Roq1* tomatoes to resist *X.*  
129 *perforans* infection in the field. *Roq1* tomatoes were grown along with the Fla. 8000 wild-type  
130 parent as well as a Fla. 8000 variety expressing the Bs2 gene from pepper as a resistant control  
131 (Kunwar et al. 2018). For each of the three growing seasons both *Roq1* and the resistant *Bs2*  
132 control tomatoes showed significantly lower disease severity than the parental Fla. 8000 variety  
133 (Table 1) ( $p < 0.05$ ). The total marketable yield of the *Roq1* plants was not significantly different  
134 from that of the susceptible parent for any of the three seasons ( $p > 0.05$ ).

135

### 136 **The *R. solanacearum* RipB effector, a homolog of XopQ/HopQ1, is recognized by Roq1**

137 RipB, considered a “core” effector of *R. solanacearum*, is present in approximately 90% of  
138 sequenced strains (Sabbagh et al. 2019), making it an attractive target ligand for engineering  
139 crop plants to be resistant to this pathogen. *Roq1* perceives diverse alleles of *XopQ* and *HopQ1*  
140 and we hypothesized that it can also recognize RipB. We constructed a phylogenetic tree of  
141 RipB, *XopQ*, and *HopQ1* alleles identified by BLAST search and observed two major clades of  
142 RipB proteins, corresponding to phlotypes I and III (strains originating in Asia and Africa) and  
143 to phlotype II (strains originating in the Americas) (Fig. 3). We selected RipB alleles from *R.*  
144 *solanacearum* strains GMI1000 and MolK2, which are present in clades 1 and 2, respectively,

145 for subsequent analysis. These two RipB alleles share 71% amino acid identity with each other  
146 and approximately 52% identity with XopQ excluding the divergent N terminus containing the  
147 putative type III secretion signal. An alignment of these two RipB proteins with XopQ and  
148 HopQ1 is shown in Supplementary Fig. 2. To test for Roq1-dependent recognition of RipB, we  
149 used *Agrobacterium* to transiently express RipB from GMI1000 and Molk2 in leaf tissue of wild-  
150 type and *roq1* mutant *N. tabacum*. Both RipB alleles triggered a strong hypersensitive / cell  
151 death response in wild-type *N. tabacum*, indicating immune activation. This response was  
152 absent in the *roq1-1* mutant but could be restored by transiently expressing Roq1 along with  
153 XopQ, RipB<sub>GMI1000</sub>, or RipB<sub>Molk2</sub> (Fig. 4).

154

### 155 ***Roq1* tomatoes are resistant to *R. solanacearum* containing RipB**

156 Our observation that Roq1 can recognize RipB in leaf transient expression assays suggested  
157 that Roq1 can mediate resistance to bacterial wilt caused by *R. solanacearum*. We tested this  
158 hypothesis by challenging wild-type and Roq1-expressing tomato plants with *R. solanacearum*  
159 strain GMI1000 using a soil soak inoculation disease assay. Wild-type plants developed severe  
160 wilting approximately seven days after inoculation, whereas *Roq1* tomato plants remained  
161 mostly healthy over the two-week time course. The *Roq1* tomato plants were susceptible to a  
162 deletion mutant lacking RipB (GMI1000  $\Delta ripB$ ) (Fig. 5a). We also challenged plants by  
163 introducing bacteria directly to the xylem by placing bacteria on the surface of a cut petiole.  
164 Wild-type plants were wilted at eight days whereas *Roq1* plants remained healthy (Fig. 5b).  
165 Tomatoes expressing *Roq1* were also resistant to *R. solanacearum* strain UW551, which is a  
166 Race 3 Biovar 2 potato brown rot strain that has a clade 2 RipB allele (Supplementary Fig. 3).

167

### 168 **Occurrence of RipB in the *R. solanacearum* species complex**

169 To investigate the potential for using *Roq1* to protect plants from *R. solanacearum*, we  
170 investigated the occurrence of RipB alleles in select *R. solanacearum* strains. Table 2  
171 summarizes published known hosts of several *R. solanacearum* strains along with the phylotype  
172 and identified RipB allele. All strains in Table 2 except for tobacco pathogenic strains K60, Y45,  
173 BK1002 and OE1-1 contain putative full-length and functional RipB alleles. Relative to other  
174 RipB alleles, the K60 RipB allele is truncated at residue 437 and missing approximately 65 C-  
175 terminal residues and the OE1-1 allele is truncated at residue 425, missing approximately 77  
176 residues based on a published genome sequence (Hayes, MacIntyre, and Allen 2017). Y45  
177 does not have a predicted RipB allele based on a draft genome sequence (Z. Li et al. 2011).

178

## 179 **Discussion**

180 *Roq1* expression in tomato confers strong resistance to *X. perforans*, *X. euvesicatoria* and *P.*  
181 *syringae* pv. *tomato*. Its effectiveness is dependent on the presence of the recognized effector  
182 protein XopQ/HopQ1 (Fig. 1, 2). Field trials revealed that tomatoes expressing *Roq1* were less  
183 susceptible to *X. perforans* than wild-type tomatoes in conditions approximating commercial  
184 production (Table 1). *Roq1* conferred a similar level of resistance as the Bs2-containing  
185 resistant check variety in one season and was slightly weaker in the other two. Bacterial spot  
186 caused by *X. perforans* can cause lesions on fruits, making them unsuitable for commercial  
187 sale, and also reduce plant productivity by damaging leaf tissue. Despite showing strong  
188 disease resistance, the tested *Roq1* line did not give a significantly greater total marketable  
189 yield than the susceptible parental variety. Of the three seasons, Spring 2019 had weather  
190 conditions expected to be most conducive for observing an impact of bacterial spot on  
191 marketable yield with mid-season rain promoting the early development of disease symptoms.  
192 The average marketable yield for the *Roq1* tomatoes was 27% higher than wild-type in this  
193 season, although a relatively small sample size (4 replicate plots of ten plants each) and a large



194 variability of yield between plots resulted in a p-value of 0.08 by Student's t-test. Although we  
195 cannot conclude that *Roq1* improves marketable yield of tomatoes from this data, a larger trial  
196 under high disease pressure may reveal such a difference.

197 It was unclear if *Roq1* could confer resistance to *R. solanacearum* because it colonizes different  
198 tissues than *Xanthomonas* and *P. syringae*. While *Xanthomonas* and *P. syringae* colonize  
199 tomato leaf tissue, *R. solanacearum* enters through the roots and colonizes xylem vessels.  
200 Although *R. solanacearum*'s type III secretion system is essential for virulence, it is not clear  
201 when and where the pathogen delivers effectors into host cells. It was therefore not clear if  
202 *Roq1* would be able to confer resistance to this pathogen in tomato. Here we confirmed that  
203 tomato plants expressing *Roq1* had strong resistance to *R. solanacearum* expressing RipB as  
204 measured by both soil soak and cut-petiole inoculation assays. This result is consistent with and  
205 expands on the recent report that RipB is recognized in *Nicotiana* species and that silencing  
206 *Roq1* confers susceptibility to *R. solanacearum* in *Nicotiana benthamiana* (Nakano and  
207 Mukaihara 2019). In addition, *Roq1* confers resistance to *R. solanacearum* Race 3 biovar 3  
208 strain UW551, a pathogen that can overcome other known sources of bacterial wilt resistance in  
209 tomato (Milling, Babujee, and Allen 2011). Some but not all of the *Roq1* tomatoes inoculated by  
210 the soil soak assay were colonized by *R. solanacearum* (Supplementary Fig. 4), implying that  
211 *Roq1* both restricts the establishment of vascular colonization and separately reduces bacterial  
212 titers if colonization does occur. Activation of immune receptors, including *Roq1*, is known to  
213 induce many defense-associated genes with different putative activities (Sohn et al. 2014; Qi et  
214 al. 2018), presumably acting to inhibit pathogen virulence by distinct mechanisms. The  
215 observation that *Roq1* inhibits both colonization establishment and population growth suggest  
216 that at least two independent downstream defense responses mediate the observed resistance  
217 phenotype.

218 The *Roq1* tomatoes were fully susceptible to an *R. solanacearum* mutant lacking *RipB*,  
219 indicating that the resistance depends on the interaction between *RipB* and *Roq1*. This is

220 consistent with the observation that several naturally occurring *R. solanacearum* strains that can  
221 infect tobacco have truncated or are missing the RipB effector (Table 2)(Nakano and Mukaihara  
222 2019), suggesting that losing RipB can allow the pathogen to overcome the native *Roq1* gene  
223 present in *Nicotiana tabacum*. Tobacco-infecting strains K60 and OE1-1 contain independently  
224 truncated RipB alleles (Fig. 3) and there have likely been multiple independent gene loss events  
225 which enable strains to evade Roq1-mediated resistance. Similarly, HopQ1 has been lost in  
226 strains of *P. syringae* that can infect tobacco (Denny 2006; Ferrante and Scortichini 2009; Z. Li  
227 et al. 2011). This suggests that this effector is not essential for virulence and it would therefore  
228 be prudent to deploy *Roq1* in combination with other disease resistance traits to avoid  
229 resistance breakdown due to pathogens losing XopQ/HopQ1/RipB.

230 No other known NLR immune receptor confers resistance against such a broad range of  
231 bacterial pathogens as Roq1. Effectors that are recognized by NLR proteins act as avirulence  
232 factors and are under strong evolutionary pressure to diversify or be lost to evade immune  
233 activation. Therefore the effector repertoires of pathogens are often quite diverse, with relatively  
234 few “core” effectors conserved within a species and even fewer shared between different  
235 genera (Grant et al. 2006). Effectors recognized by plant NLRs are typically narrowly conserved  
236 within a single bacterial genus (Kapos, Devendrakumar, and Li 2019). One such effector is  
237 AvrBs2, recognized by the Bs2 receptor from pepper, which is present in many *Xanthomonas*  
238 strains but is absent from *P. syringae* and *R. solanacearum*. In contrast XopQ/HopQ1/RipB is  
239 highly conserved in most *Xanthomonas*, *P. syringae* and *R. solanacearum* strains that cause  
240 disease in crop plants including kiwi (*P. syringae* pv. *actinidae*), banana (*R. solanacearum* and  
241 *X. campestris* pv. *musacearum*), stone fruit (*P. syringae*), pepper (*X. euvesicatoria*), citrus (*X.*  
242 *citri*), strawberry (*X. fragariae*), brassica (*X. campestris*), rice (*X. oryzae*), potato (*R.*  
243 *solanacearum*) and others. *R. solanacearum* Race 3 Biovar 2 strains are of particular concern  
244 because they are cold tolerant and potentially threaten potato cultivation in temperate climates.

245 As a result, *R. solanacearum* Race 3 biovar 2 is a strictly regulated quarantine pathogen in  
246 Europe and North America and is on the United States Select Agent list. The ability of *Roq1* to  
247 protect tomato from the Race 3 Biovar 2 strain UW551 (Supplementary Fig. 3) suggests that  
248 *Roq1* can also protect potato from this high-concern pathogen. This work demonstrates the  
249 widespread potential of using naturally occurring plant immune receptors to manage diverse  
250 and difficult to control pathogen species safely, sustainably and economically.

251

## 252 **Methods**

### 253 Generation of tomato expressing Roq1

254 The *Roq1* coding sequence was amplified from *N. benthamiana* cDNA and cloned into the  
255 pORE E4 binary plasmid (Coutu et al. 2007). *A. tumefaciens* co-cultivation was used to  
256 transform *Roq1* into the commercial tomato variety Fla. 8000 at the University of Nebraska Plant  
257 Transformation Core Research Facility. Transformed plants were selected by resistance to  
258 kanamycin, confirmed by genotyping, and selfed to obtain homozygous lines.

259

### 260 Bacterial Leaf Spot and Leaf Speck disease assays

261 *Xanthomonas spp.* cultures were grown in NYG broth (0.5% peptone, 0.3% yeast extract, 2%  
262 glycerol) with rifampicin (100 µg / mL) overnight at 30 °C. *P. syringae* cultures were grown in KB  
263 broth (1% peptone, 0.15% K<sub>2</sub>HPO<sub>4</sub>, 1.5% glycerol, 5 mM MgSO<sub>4</sub>, pH 7.0) with rifampicin (100  
264 µg / mL) overnight at 28 °C. Bacterial cultures were spun down at 5200 g, washed once with 10  
265 mM MgCl<sub>2</sub>, and then diluted to the appropriate infiltration density with 10 mM MgCl<sub>2</sub>. Leaf tissue  
266 of tomato plants (approximately four weeks old) was infiltrated with bacterial solution using a  
267 needleless syringe. To quantify bacterial growth, leaf punches were homogenized in water,  
268 serially diluted and plated on NYG (for *Xanthomonas spp.*) or KB (for *P. syringae*) plates  
269 supplemented with 100 µg / mL rifampicin and 50 µg / mL cycloheximide to measure colony

270 forming units. *X. perforans* strain 4B, *X. euvesicatoria* strain 85-10, and *P. syringae* strain  
271 DC3000 and the corresponding XopQ/HopQ1 deletion mutants were described previously  
272 (Schwartz et al. 2015; Schultink et al. 2017). The *P. syringae* pv. *tomato* Race 1 strain was  
273 isolated from a field of tomatoes with the PTO resistance gene in 1993 in California.

274

275 Transient expression of RipB and XopQ

276 Alleles of RipB from *R. solanacearum* (NCBI Genbank accessions CAD13773.2 and  
277 WP\_003278485) were synthesized and cloned into a Bsal-compatible version of the pORE E4  
278 vector (Coutu et al. 2007). This plasmid was transformed into *A. tumefaciens* strain C58C1. *A.*  
279 *tumefaciens* cultures were grown on a shaker overnight at 30 °C in LB broth with rifampicin (100  
280 µg / mL), tetracycline (10 µg / mL) and kanamycin (50 µg / mL). The cells were collected by  
281 centrifugation and resuspended in infiltration buffer (10 mM 2-(N-morpholino)ethanesulfonic  
282 acid, 10 mM MgCl<sub>2</sub>, pH 5.6), and diluted to an OD<sub>600</sub> of 0.5 for infiltration into *N. tabacum* leaf  
283 tissue.

284

285 *N. tabacum roq1* mutant lines

286 *N. tabacum roq1* mutant lines were generated by transforming *N. tabacum* with a construct  
287 coding for CAS9 and a guide RNA targeting the Roq1 gene with the sequence  
288 GATGATAAGGAGTTAAAGAG. This construct was also used for the generation of *N.*  
289 *benthiana roq1* mutants published in Qi et al. 2018. Transformed *N. tabacum* plants were  
290 generated by Agrobacterium co-cultivation and selected for using kanamycin. Transformed  
291 plants were genotyped for the presence of mutations at the target site by PCR and Sanger  
292 sequencing. The *N. tabacum* mutant *roq1-1* has a single base pair A insertion at the target cut  
293 site in the *Roq1* gene.

294

295 Bacterial wilt virulence assays

296 *R. solanacearum* virulence on tomato was measured as previously described (Khokhani et al.  
297 2018). Briefly, cells of *R. solanacearum* strain GMI1000 grown overnight in CPG (0.1% casein  
298 hydrolysate, 1% peptone, 0.5% glucose, pH 7.0) at 28°C were collected by centrifugation and  
299 diluted to an OD<sub>600</sub> of 0.1 in water (1x10<sup>8</sup> CFU/ml). 50 mL of this suspension was poured on the  
300 soil around 17-day old tomato plants. Disease was rated daily for two weeks on a 0-4 disease  
301 index scale, where 0 is no leaves wilted, 1 is 1-25% wilted, 2 is 26-50% wilted, 3 is 51-75% of  
302 wilted, and 4 is 76-100% wilted. Data represent a total of four biological replicates with ten  
303 plants per replicate. Virulence data were analyzed using repeated measures ANOVA (Khokhani  
304 et al 2018). For petiole infection, the petiole of the first true leaf was cut with a razor blade  
305 horizontally approximately 1 cm from the stem. A drop of bacterial solution (2 uL, OD<sub>600</sub> = 0.001)  
306 was pipetted onto the exposed cut petiole surface.

307

308 Field trial disease assays

309 Three field trials were conducted at the University of Florida Gulf Coast Research and  
310 Education Center in Balm during the spring seasons of 2018 and 2019 and the fall season of  
311 2018 and under the notification process of the United States Department of Agriculture. Large-  
312 fruited, fresh market tomato lines were used in these trials and included the inbred line, Fla.  
313 8000, and nearly-isogenic lines containing either *Roq1* (event 316.4) or *Bs2* (Kunwar et al.  
314 2018); along with commercial hybrids Florida 91, Sanibel, and HM 1823 as additional,  
315 susceptible controls (data not shown). For each trial, seeds were sown directly into peat-lite  
316 soilless media (Speedling, Sun City, FL, USA) in 128-cell trays (38 cm<sup>3</sup> cell size). Transplants  
317 were grown in a greenhouse until 5 or 6 weeks, then planted to field beds that had been  
318 fumigated and covered with reflective plastic mulch. Field trials were conducted using a  
319 randomized complete block design with four blocks and 10-plant plots. Field plants were staked  
320 and tied, and irrigation was applied through drip tape beneath the plastic mulch of each bed. A  
321 recommended fertilizer and pesticide program were followed throughout the growing season,

322 excluding the use of plant defense inducers, copper, or other bactericides (Freeman et al.  
323 2018). Fruit were harvested from the inner 8 plants of each plot at the breaker stage and  
324 beyond graded for marketability according to USDA specifications. Yield data were analyzed  
325 using the PROC GLIMMIX procedure in SAS (version 9.4; SAS Institute, Cary, NC, USA), and  
326 block was considered random effects.

327 Field trials were inoculated with *X. perforans* race T4 (strain mixture of GEV904, GEV917,  
328 GEV1001, and GEV1063). Bacterial strains were grown on nutrient agar medium (BBL, Becton  
329 Dickinson and Co., Cockeysville, MD) and incubated at 28 °C for 24 h. Bacterial cells were  
330 removed from the plates and suspended in a 10 mM MgSO<sub>4</sub>·7H<sub>2</sub>O solution, and the suspension  
331 was adjusted to OD<sub>600</sub>=0.3, which corresponds to 10<sup>8</sup> CFU/ml. The suspension for each strain  
332 was then diluted to 10<sup>6</sup> CFU/ml, mixed in equal volume, and applied along with polyoxyethylene  
333 sorbitan monolaurate (Tween 20; 0.05% [vol/vol]) for field inoculation. Field trial plants were  
334 inoculated approximately 3 weeks after transplanting.

335 Bacterial spot disease severity was recorded three to eight weeks after inoculation using the  
336 Horsfall-Barratt scale (Horsfall, JG and Barratt, RW 1945), and ratings were converted to  
337 midpoint percentages for statistical analysis. Disease severity data were analyzed using a  
338 nonparametric procedure for the analysis of ordinal data (Brunner and Puri 2001; Shah and  
339 Madden 2004). Analysis of variance type statistic of ranked data was conducted using the  
340 PROC MIXED procedure in SAS. Relative marginal effects (RME) were generated with the  
341 equation:  $RME = (R - 0.5)/N$ ; where  $R$  is the mean treatment ranking, and  $N$  is the total number  
342 of experimental units in the analysis; the LD\_CI macro was used to generate 95% confidence  
343 intervals (Brunner and Puri 2001; Shah and Madden 2004). Blocks were considered random  
344 effects.

345 Generation of the *R. solanacearum*  $\Delta ripB$  mutant

346 An unmarked *ΔripB* mutant was created using *sacB* positive selection with the vector pUFR80  
347 (Castañeda et al. 2005). Briefly, the regions upstream and downstream of *ripB* were amplified  
348 using the primers ripBupF/R and ripBdwnF/R. These fragments were inserted into pUFR80  
349 digested with HindIII and EcoRI using Gibson Assembly (Gibson et al. 2009) (New England  
350 Biolabs, Ipswich, MA) and this construct was incorporated into the genome of strain GMI1000  
351 using natural transformation, with successful integrants selected on CPG + kanamycin (Coupat  
352 et al. 2008). Plasmid loss was then selected for on CPG plates containing 5% w/v sucrose.  
353 Correct deletions were confirmed using PCR and sequencing.  
354 Phylogenetic analysis of XopQ, HopQ1 and RipB alleles  
355 RipB alleles were identified by BLAST search of the NCBI protein database. Clustal Omega  
356 (Sievers et al. 2011) was used to generate a multiple sequence alignment with XopQ and  
357 HopQ1 alleles. To span the diversity of RipB alleles without have many redundant sequences,  
358 only a single sequence was retained if there were multiple identical or nearly identical  
359 sequences identified. A maximum likelihood tree was generated using PhyML (Guindon et al.  
360 2010).

361

## 362 **Acknowledgements**

363 We thank Shirley Sato and Tom Clemente of the University of Nebraska Plant Transformation  
364 Core Research Facility for the transformation of tomato. We thank Myeong-Je Cho and Julie  
365 Pham of the UC Berkeley Innovative Genomics Institute for transformation of *Nicotiana*  
366 *tabacum*.

367

## 368 **Competing Interests**

369 A. S. and N.C.T. are employees of and have a financial stake in Fortiphyte Inc., which has  
370 intellectual property rights related to the Roq1 resistance gene.  
371



372 **Tables**

| Season / Genotype  | Disease severity | Marketable yield (kg/ha) |
|--------------------|------------------|--------------------------|
| <b>Spring 2018</b> |                  |                          |
| Fla. 8000          | 86 ± 5           | 54,655 ± 9,450           |
| Fla. 8000 Roq1     | 1 ± 1            | 52,656 ± 3,810           |
| Fla. 8000 Bs2      | 1 ± 1            | 66,270 ± 10,309          |
| <b>Fall 2018</b>   |                  |                          |
| Fla. 8000          | 25 ± 7           | 19,576 ± 11,038          |
| Fla. 8000 Roq1     | 5 ± 1            | 18,538 ± 5,901           |
| Fla. 8000 Bs2      | 0 ± 0            | 33,770 ± 13,176          |
| <b>Spring 2019</b> |                  |                          |
| Fla. 8000          | 84 ± 2           | 73,009 ± 15,243          |
| Fla. 8000 Roq1     | 11 ± 7           | 92,837 ± 11,072          |
| Fla. 8000 Bs2      | 5 ± 1            | 80,516 ± 14,531          |

373

374 **Table 1.** Field trial results. A field trial was conducted in Florida with disease pressure from  
 375 *Xanthomonas perforans*. Disease severity was scored out of 100 using the Horsfall-Barratt  
 376 scale. Harvested tomatoes were graded and sized by USDA specifications to calculate the total  
 377 marketable yield. The values shown are means ± standard deviation from at least four replicate  
 378 plots of ten plants each. Tomato plants expressing the Bs2 immune receptor gene were  
 379 included as a resistant control.

| Strain   | Host(s)                     | Phylotype | RipB allele | RipB accession |
|----------|-----------------------------|-----------|-------------|----------------|
| GMI1000  | Tomato, Pepper, Arabidopsis | I         | Present     | WP_011000212   |
| RS1000   | Tomato                      | I         | Present     | BAD42390       |
| OE1-1    | Tobacco                     | I         | Truncated   | APC67368       |
| BK1002   | Tobacco                     |           | Truncated   | LC459955       |
| Y45      | Tobacco                     | IB        | Absent      |                |
| K60      | Tomato, Tobacco             | IIA       | Truncated   | CCF97494       |
| CFBP2957 | Tomato                      | IIA       | Present     | CBJ44424       |
| Po82     | Tomato, Banana, Potato      | IIB       | Present     | WP_014618158   |
| IPO1609* | Potato                      | IIB       | Present     | WP_020956993   |
| MolK2    | Banana                      | IIB       | Present     | WP_003278485   |
| UW551*   | Geranium, Tomato            | IIB       | Present     | EAP72492       |
| CMR15    | Tomato                      | III       | Present     | WP_020749919   |
| PSI07    | Tomato                      | IV        | Present     | WP_013213770   |
| BDB R229 | Banana                      |           | Present     | WP_078222314   |

380

381 **Table 2.** RipB occurrence and host range in *Ralstonia solanacearum*. The published host range  
 382 of select *Ralstonia solanacearum* strains is listed along with the identified RipB allele. Truncated

383 indicates that the identified allele is missing conserved residues at the C terminus and is  
384 putatively non-functional. \* indicates a Race 3 Biovar 2 Select Agent strain.

## 385 **Figure Legends**

386 **Figure 1.** Bacterial growth in tomatoes expressing Roq1. *Xanthomonas perforans* 4B (*Xp*),  
387 *Xanthomonas euvesicatoria* 85-10 (*Xe*), and *Pseudomonas syringae* DC3000 (*Ps*) were  
388 infiltrated into leaf tissue of wild-type tomato and tomato expressing Roq1 at a low inoculum  
389 ( $OD_{600} = 0.0001$  for *Xe* and *Xp*;  $OD_{600} = 0.00005$  for *Ps*). Bacterial abundance was quantified by  
390 homogenizing leaf punches and counting colony forming units (CFU) per square centimeter of  
391 leaf tissue at six days post infiltration for *Xe* and *Xp*; three days post infiltration for *Ps*. Error bars  
392 indicate standard deviation. \* =  $p < 0.05$ , \*\* =  $p < 0.01$  by Student's t-test.

393

394 **Figure 2.** Bacterial disease symptoms on *Roq1* tomato. *Xanthomonas perforans* 4B (*Xp*),  
395 *Xanthomonas euvesicatoria* 85-10 (*Xe*), and *Pseudomonas syringae* DC3000 (*Ps*) wild-type and  
396 XopQ/HopQ1 knockout strains were infiltrated into tomato leaf tissue at low inoculum and  
397 disease symptoms were imaged at twelve, thirteen and four days post infiltration for *Xe*, *Xp* and  
398 *Ps* respectively. The infiltration was performed using a needleless syringe and circular wounds  
399 from the infiltration are visible. The distal part of region of each leaf was infiltrated and the  
400 proximal part was left untreated. *Xe* and *Xp* were infiltrated at an  $OD_{600}$  of 0.0001 whereas *Ps*  
401 was infiltrated at an  $OD_{600}$  of 0.00005.

402 **Figure 3.** Phylogenetic tree of RipB proteins. Two major clades of RipB alleles from *Ralstonia*  
403 *solanacearum* strains are visible in a maximum likelihood tree generated from XopQ, HopQ1  
404 and RipB protein sequences. RipB alleles from *Ralstonia solanacearum* strains GMI1000 and  
405 MolK2 were cloned for testing in this study and are indicated by pink dots. Several alleles have  
406 truncations that may make them nonfunctional (indicated by a half circle). Abbreviations were

407 used for *Ralstonia* (R) and *Ralstonia solanacearum* (Rs).

408 **Figure 4.** Roq1-dependent recognition of RipB in *Nicotiana tabacum*. *Agrobacterium*  
409 *tumefaciens* was used to transiently expressed XopQ, RipB<sub>GMI1000</sub> and RipB<sub>MolIK2</sub> along with  
410 either Roq1 or an empty vector (EV) control in wild-type *Nicotiana tabacum* and a *roq1* loss of  
411 function mutant. The *Agrobacterium* was infiltrated at a total OD<sub>600</sub> of 0.5 and the leaves were  
412 imaged at three days post infiltration.

413 **Figure 5.** Bacterial Wilt disease development in Roq1 tomatoes. (a) Wild-type and Roq1  
414 tomatoes were infected with wild-type and RipB mutant *Ralstonia solanacearum* strain GMI1000  
415 by soil soak inoculation. Disease symptoms were monitored over 14 days, with no wilting  
416 corresponding to a Disease Index of 0 and complete wilting corresponding to a Disease Index of  
417 4. Error bars indicate standard error. (b) Wild-type and Roq1 tomato plants 8 days after petiole  
418 inoculation with approximately 2,000 cells of wild-type GMI1000.

419

## 420 References

- 421 Boller, T., and S. Y. He. 2009. "Innate Immunity in Plants: An Arms Race between Pattern  
422 Recognition Receptors in Plants and Effectors in Microbial Pathogens." *Science* 324  
423 (5928): 742–44.
- 424 Brunner, Edgar, and Madan L. Puri. 2001. "Nonparametric Methods in Factorial Designs."  
425 *Statistical Papers* 42 (1): 1–52.
- 426 Castañeda, Adriana, Joseph D. Reddy, Basma El-Yacoubi, and Dean W. Gabriel. 2005.  
427 "Mutagenesis of All Eight Avr Genes in *Xanthomonas Campestris* Pv. *Campestris* Had  
428 No Detected Effect on Pathogenicity, but One Avr Gene Affected Race Specificity."  
429 *Molecular Plant-Microbe Interactions: MPMI* 18 (12): 1306–17.
- 430 Coupat, Bénédicte, Fanny Chaumeille-Dole, Saliou Fall, Philippe Prior, Pascal Simonet, Xavier  
431 Nesme, and Franck Bertolla. 2008. "Natural Transformation in the *Ralstonia*  
432 *Solanacearum* Species Complex: Number and Size of DNA That Can Be Transferred."  
433 *FEMS Microbiology Ecology* 66 (1): 14–24.
- 434 Coutu, Catherine, James Brandle, Dan Brown, Kirk Brown, Brian Miki, John Simmonds, and  
435 Dwayne D. Hegedus. 2007. "pORE: A Modular Binary Vector Series Suited for Both  
436 Monocot and Dicot Plant Transformation." *Transgenic Research* 16 (6): 771–81.
- 437 Dangl, Jeffery L., Diana M. Horvath, and Brian J. Staskawicz. 2013. "Pivoting the Plant Immune  
438 System from Dissection to Deployment." *Science* 341 (6147): 746–51.
- 439 Davis, R. M., G. Miyao, K. V. Subbarao, J. J. Stapleton, and And B. J. Aegerter. 2013. "UC IPM:  
440 UC Management Guidelines - TOMATO:Diseases." 3470. UC Davis.  
441 <http://ipm.ucanr.edu/PMG/r783101611.html>.
- 442 Denny, Tim. 2006. "Plant Pathogenic *Ralstonia* Species." In *Plant-Associated Bacteria*, edited  
443 by Samuel S. Gnanamanickam, 573–644. Dordrecht: Springer Netherlands.
- 444 Deslandes, Laurent, and Susana Rivas. 2012. "Catch Me If You Can: Bacterial Effectors and

- 445 Plant Targets.” *Trends in Plant Science* 17 (11): 644–55.
- 446 Dillon, Marcus M., Renan N. D. Almeida, Bradley Laflamme, Alexandre Martel, Bevan S. Weir,  
447 Darrell Desveaux, and David S. Guttman. 2019. “Molecular Evolution of *Pseudomonas*  
448 *Syringae* Type III Secreted Effector Proteins.” *Frontiers in Plant Science* 10 (April): 418.
- 449 Ferrante, Patrizia, and Marco Scortichini. 2009. “Identification of *Pseudomonas Syringae* Pv.  
450 *Actinidiae* as Causal Agent of Bacterial Canker of Yellow Kiwifruit (*Actinidia Chinensis*  
451 *Planchon*) in Central Italy.” *Journal of Phytopathology* 157 (11-12): 768–70.
- 452 Freeman, J. H., E. J. McAvoy, N. S. Boyd, Kinessary R., Ozores-Hampton M., H. A. Smith,  
453 Desaeager J., J. W. Noling, and G. E. Vallad. 2018. “Tomato Production.” In *Vegetable*  
454 *Production Handbook of Florida 2018–2019*, edited by H. A. Smith, J. H. Freeman, P. J.  
455 Dittmar, M. L. Paret, and G. E. Vallad, 349–93. Lincolnshire, IL: Vance Publishing  
456 Corporation.
- 457 Gibson, Daniel G., Lei Young, Ray-Yuan Chuang, J. Craig Venter, Clyde A. Hutchison 3rd, and  
458 Hamilton O. Smith. 2009. “Enzymatic Assembly of DNA Molecules up to Several  
459 Hundred Kilobases.” *Nature Methods* 6 (5): 343–45.
- 460 Giska, Fabian, Malgorzata Lichocka, Marcin Piechocki, Michał Dadlez, Elmon Schmelzer, Jacek  
461 Hennig, and Magdalena Krzymowska. 2013. “Phosphorylation of HopQ1, a Type III  
462 Effector from *Pseudomonas Syringae*, Creates a Binding Site for Host 14-3-3 Proteins.”  
463 *Plant Physiology* 161 (4): 2049–61.
- 464 Grant, Sarah R., Emily J. Fisher, Jeff H. Chang, Beth M. Mole, and Jeffery L. Dangl. 2006.  
465 “Subterfuge and Manipulation: Type III Effector Proteins of Phytopathogenic Bacteria.”  
466 *Annual Review of Microbiology* 60: 425–49.
- 467 Griffin, Karina, Cherie Gambley, Philip Brown, and Yujuan Li. 2017. “Copper-Tolerance in  
468 *Pseudomonas Syringae* Pv. *Tomato* and *Xanthomonas* Spp. and the Control of  
469 Diseases Associated with These Pathogens in *Tomato* and *Pepper*. A Systematic  
470 Literature Review.” *Crop Protection* 96: 144–50.

- 471 Gudesblat, Gustavo E., Pablo S. Torres, and Adrián A. Vojnov. 2009. "Xanthomonas  
472 Campestris Overcomes Arabidopsis Stomatal Innate Immunity through a DSF Cell-to-  
473 Cell Signal-Regulated Virulence Factor." *Plant Physiology* 149 (2): 1017–27.
- 474 Guindon, Stéphane, Jean-François Dufayard, Vincent Lefort, Maria Anisimova, Wim Hordijk,  
475 and Olivier Gascuel. 2010. "New Algorithms and Methods to Estimate Maximum-  
476 Likelihood Phylogenies: Assessing the Performance of PhyML 3.0." *Systematic Biology*  
477 59 (3): 307–21.
- 478 Hann, Dagmar R., Ana Domínguez-Ferreras, Vaclav Motyka, Petre I. Dobrev, Sebastian  
479 Schornack, Anna Jehle, Georg Felix, Delphine Chinchilla, John P. Rathjen, and Thomas  
480 Boller. 2014. "The Pseudomonas Type III Effector HopQ1 Activates Cytokinin Signaling  
481 and Interferes with Plant Innate Immunity." *The New Phytologist* 201 (2): 585–98.
- 482 Hayes, Madeline M., April M. MacIntyre, and Caitilyn Allen. 2017. "Complete Genome  
483 Sequences of the Plant Pathogens *Ralstonia Solanacearum* Type Strain K60 and *R.*  
484 *Solanacearum* Race 3 Biovar 2 Strain UW551." *Genome Announcements* 5 (40).  
485 <https://doi.org/10.1128/genomeA.01088-17>.
- 486 Horsfall, JG, and Barrat, RW. 1945. "An Improved Grading System for Measuring Plant  
487 Diseases." *Phytopathology* 35: 655.
- 488 Jones, Jonathan D. G., and Jeffery L. Dangl. 2006. "The Plant Immune System." *Nature* 444  
489 (7117): 323–29.
- 490 Jones, Jonathan D. G., Russell E. Vance, and Jeffery L. Dangl. 2016. "Intracellular Innate  
491 Immune Surveillance Devices in Plants and Animals." *Science* 354 (6316).  
492 <https://doi.org/10.1126/science.aaf6395>.
- 493 Jones, Jonathan D. G., Kamil Witek, Walter Verweij, Florian Jupe, David Cooke, Stephen  
494 Dorling, Laurence Tomlinson, Matthew Smoker, Sara Perkins, and Simon Foster. 2014.  
495 "Elevating Crop Disease Resistance with Cloned Genes." *Philosophical Transactions of*  
496 *the Royal Society of London. Series B, Biological Sciences* 369 (1639): 20130087.

- 497 Kapos, Paul, Karen Thulasi Devendrakumar, and Xin Li. 2019. "Plant NLRs: From Discovery to  
498 Application." *Plant Science: An International Journal of Experimental Plant Biology* 279  
499 (February): 3–18.
- 500 Kay, Sabine, and Ulla Bonas. 2009. "How Xanthomonas Type III Effectors Manipulate the Host  
501 Plant." *Current Opinion in Microbiology* 12 (1): 37–43.
- 502 Kennelly, Megan M., Francisco M. Cazorla, Antonio de Vicente, Cayo Ramos, and George W.  
503 Sundin. 2007. "Pseudomonas Syringae Diseases of Fruit Trees: Progress Toward  
504 Understanding and Control." *Plant Disease* 91 (1): 4–17.
- 505 Khokhani, Devanshi, Tuan Minh Tran, Tiffany M. Lowe-Power, and Caitilyn Allen. 2018. "Plant  
506 Assays for Quantifying Ralstonia Solanacearum Virulence." *BIO-PROTOCOL* 8 (18).  
507 <https://bio-protocol.org/pdf/bio-protocol3028.pdf>.
- 508 Kunwar, Sanju, Fanny Iriarte, Qiurong Fan, Eduardo Evaristo da Silva, Laura Ritchie, Nghi Song  
509 Nguyen, Joshua H. Freeman, et al. 2018. "Transgenic Expression of EFR and Bs2  
510 Genes for Field Management of Bacterial Wilt and Bacterial Spot of Tomato."  
511 *Phytopathology* 108 (12): 1402–11.
- 512 Li, Wei, Koste A. Yadeta, James Mitch Elmore, and Gitta Coaker. 2013. "The Pseudomonas  
513 Syringae Effector HopQ1 Promotes Bacterial Virulence and Interacts with Tomato 14-3-3  
514 Proteins in a Phosphorylation-Dependent Manner." *Plant Physiology* 161 (4): 2062–74.
- 515 Li, Xin, Paul Kapos, and Yuelin Zhang. 2015. "NLRs in Plants." *Current Opinion in Immunology*  
516 32 (February): 114–21.
- 517 Li, Zefeng, Sanling Wu, Xuefei Bai, Yun Liu, Jianfei Lu, Yong Liu, Bingguang Xiao, Xiuping Lu,  
518 and Longjiang Fan. 2011. "Genome Sequence of the Tobacco Bacterial Wilt Pathogen  
519 Ralstonia Solanacearum." *Journal of Bacteriology* 193 (21): 6088–89.
- 520 Milling, Annett, Lavanya Babujee, and Caitilyn Allen. 2011. "Ralstonia Solanacearum  
521 Extracellular Polysaccharide Is a Specific Elicitor of Defense Responses in Wilt-  
522 Resistant Tomato Plants." *PloS One* 6 (1): e15853.

- 523 Nakano, Masahito, and Takafumi Mukaihara. 2019. "The Type III Effector RipB from *Ralstonia*  
524 *Solanacearum* RS1000 Acts as a Major Avirulence Factor in *Nicotiana Benthamiana* and  
525 Other *Nicotiana* Species." *Molecular Plant Pathology*, June.  
526 <https://doi.org/10.1111/mpp.12824>.
- 527 Peeters, Nemo, Sébastien Carrère, Maria Anisimova, Laure Plener, Anne-Claire Cazalé, and  
528 Stéphane Genin. 2013. "Repertoire, Unified Nomenclature and Evolution of the Type III  
529 Effector Gene Set in the *Ralstonia Solanacearum* Species Complex." *BMC Genomics* 14  
530 (December): 859.
- 531 Pontes, Nadson de Carvalho, Abadia Dos Reis Nascimento, Adelmo Golynski, Luiz Antonio  
532 Maffia, José Rogério de Oliveira, and Alice Maria Quezado-Duval. 2016. "Intervals and  
533 Number of Applications of Acibenzolar-S-Methyl for the Control of Bacterial Spot on  
534 Processing Tomato." *Plant Disease* 100 (10): 2126–33.
- 535 Potnis, Neha, Sujan Timilsina, Amanda Strayer, Deepak Shantharaj, Jeri D. Barak, Mathews L.  
536 Paret, Gary E. Vallad, and Jeffrey B. Jones. 2015. "Bacterial Spot of Tomato and  
537 Pepper: Diverse *Xanthomonas* Species with a Wide Variety of Virulence Factors Posing  
538 a Worldwide Challenge." *Molecular Plant Pathology* 16 (9): 907–20.
- 539 Qi, Tiancong, Kyungyong Seong, Daniela P. T. Thomazella, Joonyoung Ryan Kim, Julie Pham,  
540 Eunyoung Seo, Myeong-Je Cho, Alex Schultink, and Brian J. Staskawicz. 2018. "NRG1  
541 Functions Downstream of EDS1 to Regulate TIR-NLR-Mediated Plant Immunity in  
542 *Nicotiana Benthamiana*." *Proceedings of the National Academy of Sciences of the*  
543 *United States of America* 115 (46): E10979–87.
- 544 Rivard, C. L., S. O'Connell, M. M. Peet, R. M. Welker, and F. J. Louws. 2012. "Grafting Tomato  
545 to Manage Bacterial Wilt Caused by *Ralstonia Solanacearum* in the Southeastern United  
546 States." *Plant Disease* 96 (7): 973–78.
- 547 Ryan, Robert P., Frank-Jörg Vorhölter, Neha Potnis, Jeffrey B. Jones, Marie-Anne Van Sluys,  
548 Adam J. Bogdanove, and J. Maxwell Dow. 2011. "Pathogenomics of *Xanthomonas*:



- 549 Understanding Bacterium-Plant Interactions.” *Nature Reviews. Microbiology* 9 (5): 344–  
550 55.
- 551 Sabbagh, Cyrus Raja Rubenstein, Sébastien Carrère, Fabien Lonjon, Fabienne Vaillau,  
552 Alberto P. Macho, Stephane Genin, and Nemo Peeters. 2019. “Pangenomic Type III  
553 Effector Database of the Plant Pathogenic *Ralstonia* Spp.” e27726v1. *PeerJ Preprints*.  
554 <https://doi.org/10.7287/peerj.preprints.27726v1>.
- 555 Schultink, Alex, Tiancong Qi, Arielle Lee, Adam D. Steinbrenner, and Brian Staskawicz. 2017.  
556 “Roq1 Mediates Recognition of the *Xanthomonas* and *Pseudomonas* Effector Proteins  
557 XopQ and HopQ1.” *The Plant Journal: For Cell and Molecular Biology* 92 (5): 787–95.  
558
- 559 Schwartz, Allison R., Neha Potnis, Sujan Timilsina, Mark Wilson, José Patané, Joaquim Martins  
560 Jr, Gerald V. Minsavage, et al. 2015. “Phylogenomics of *Xanthomonas* Field Strains  
561 Infecting Pepper and Tomato Reveals Diversity in Effector Repertoires and Identifies  
562 Determinants of Host Specificity.” *Frontiers in Microbiology* 6 (June): 535.
- 563 Shah, D. A., and L. V. Madden. 2004. “Nonparametric Analysis of Ordinal Data in Designed  
564 Factorial Experiments.” *Phytopathology* 94 (1): 33–43.
- 565 Sharma, Sadikshya, and Krishna Bhattarai. 2019. “Progress in Developing Bacterial Spot  
566 Resistance in Tomato.” *Agronomy* 9 (1): 26.
- 567 Sievers, Fabian, Andreas Wilm, David Dineen, Toby J. Gibson, Kevin Karplus, Weizhong Li,  
568 Rodrigo Lopez, et al. 2011. “Fast, Scalable Generation of High-Quality Protein Multiple  
569 Sequence Alignments Using Clustal Omega.” *Molecular Systems Biology* 7 (October):  
570 539.
- 571 Sohn, Kee Hoon, Cécile Segonzac, Ghanasyam Rallapalli, Panagiotis F. Sarris, Joo Yong Woo,  
572 Simon J. Williams, Toby E. Newman, Kyung Hee Paek, Bostjan Kobe, and Jonathan D.  
573 G. Jones. 2014. “The Nuclear Immune Receptor RPS4 Is Required for RRS1SLH1-  
574 Dependent Constitutive Defense Activation in *Arabidopsis Thaliana*.” *PLoS Genetics* 10

- 575 (10): e1004655.
- 576 Teper, Doron, Dor Salomon, Sukumaran Sunitha, Jung-Gun Kim, Mary Beth Mudgett, and  
577 Guido Sessa. 2014. "Xanthomonas Euvesicatoria Type III Effector XopQ Interacts with  
578 Tomato and Pepper 14-3-3 Isoforms to Suppress Effector-Triggered Immunity." *The  
579 Plant Journal: For Cell and Molecular Biology* 77 (2): 297–309.
- 580 Vasse, J., P. Frey, and A. Trigalet. 1995. "Microscopic Studies of Intercellular Infection and  
581 Protoxylem Invasion of Tomato Roots by *Pseudomonas Solanacearum*."  
582 <https://pubag.nal.usda.gov/catalog/1443867>.
- 583 Vincelli, Paul. 2016. "Genetic Engineering and Sustainable Crop Disease Management:  
584 Opportunities for Case-by-Case Decision-Making." *Sustainability: Science Practice and  
585 Policy* 8 (5): 495.
- 586 Xin, Xiu-Fang, Brian Kvitko, and Sheng Yang He. 2018. "Pseudomonas Syringae: What It Takes  
587 to Be a Pathogen." *Nature Reviews. Microbiology* 16 (5): 316–28.
- 588 Yuliar, Yanetri Asi Nion, and Koki Toyota. 2015. "Recent Trends in Control Methods for  
589 Bacterial Wilt Diseases Caused by *Ralstonia Solanacearum*." *Microbes and  
590 Environments / JSME* 30 (1): 1–11.
- 591 Zipfel, Cyril. 2014. "Plant Pattern-Recognition Receptors." *Trends in Immunology* 35 (7): 345–  
592 51.

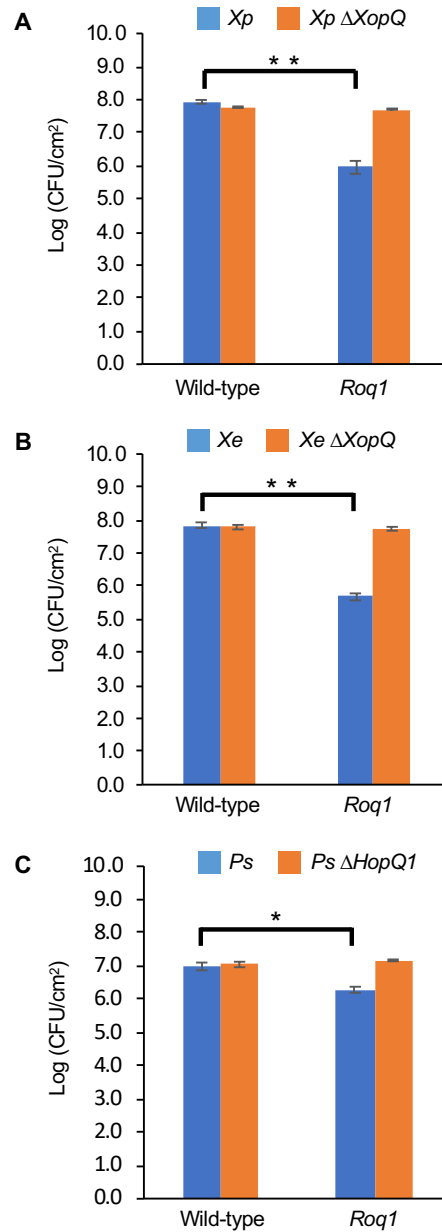

**Figure 1.** Bacterial growth in tomatoes expressing Roq1. *Xanthomonas perforans* 4B (*Xp*), *Xanthomonas euvesicatoria* 85-10 (*Xe*), and *Pseudomonas syringae* DC3000 (*Ps*) were infiltrated into leaf tissue of wild-type tomato and tomato expressing Roq1 at a low inoculum ( $OD_{600} = 0.0001$  for *Xe* and *Xp*;  $OD_{600} = 0.00005$  for *Ps*). Bacterial abundance was quantified by homogenizing leaf punches and counting colony forming units (CFU) per square centimeter of leaf tissue at six days post infiltration for *Xe* and *Xp*; three days post infiltration for *Ps*. Error bars indicate standard deviation. \* =  $p < 0.05$ , \*\* =  $p < 0.01$  by Student's t-test.

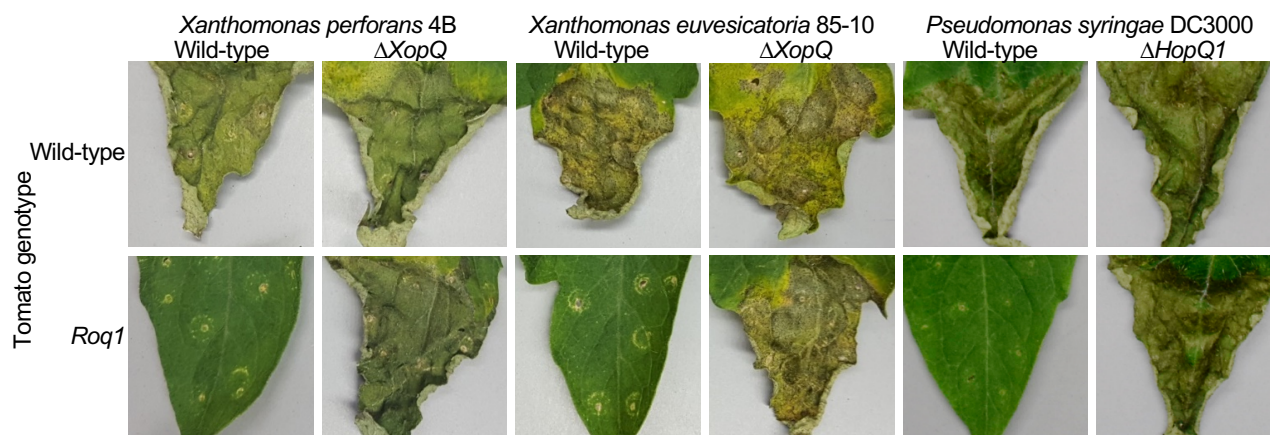

**Figure 2.** Bacterial disease symptoms on *Roq1* tomato. *Xanthomonas perforans* 4B (*Xp*), *Xanthomonas euvesicatoria* 85-10 (*Xe*), and *Pseudomonas syringae* DC3000 (*Ps*) wild-type and *XopQ*/*HopQ1* knockout strains were infiltrated into tomato leaf tissue at low inoculum and disease symptoms were imaged at twelve, thirteen and four days post infiltration for *Xe*, *Xp* and *Ps* respectively. The infiltration was performed using a needles syringe and circular wounds from the infiltration are visible. The distal part of region of each leaf was infiltrated and the proximal part was left untreated. *Xe* and *Xp* were infiltrated at an  $OD_{600}$  of 0.0001 whereas *Ps* was infiltrated at an  $OD_{600}$  of 0.00005.

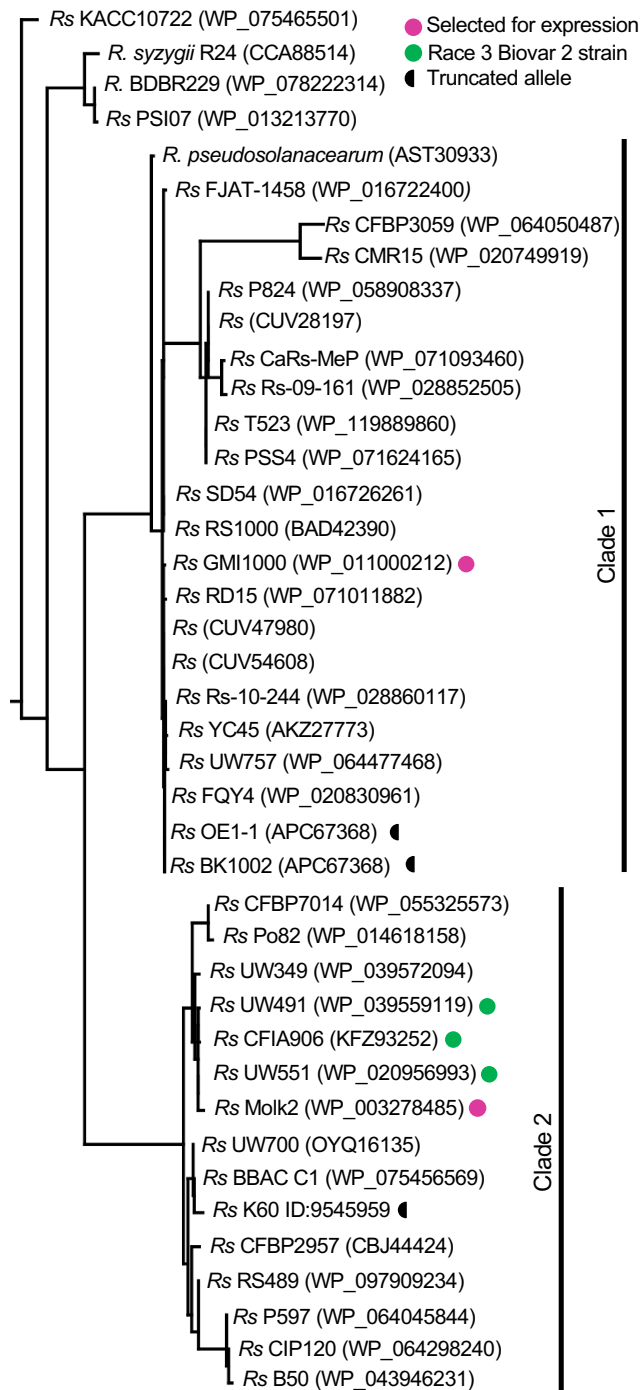

**Figure 3.** Phylogenetic tree of RipB proteins. Two major clades of RipB alleles from *Ralstonia solanacearum* strains are visible in a maximum likelihood tree generated from XopQ, HopQ1 and RipB protein sequences. RipB alleles from *Ralstonia solanacearum* strains GMI1000 and Molk2 were cloned for testing in this study and are indicated by pink dots. Several alleles have truncations that may make them nonfunctional (indicated by a half circle). Abbreviations were used for *Ralstonia* (R) and *Ralstonia solanacearum* (Rs).

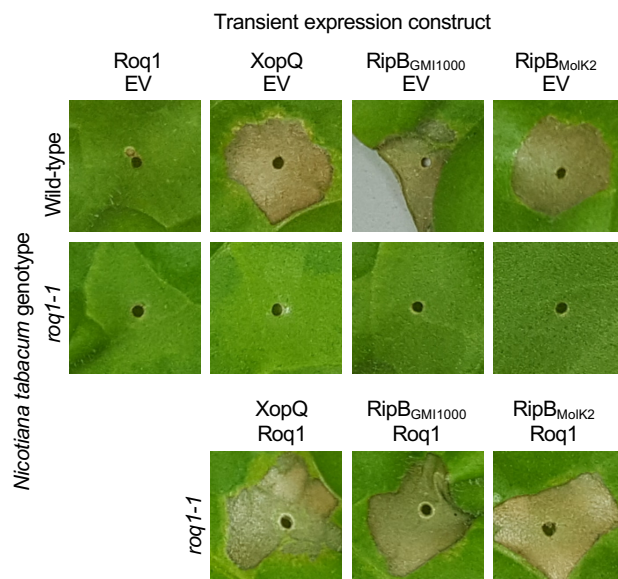

**Figure 4.**

Roq1-dependent recognition of RipB in *Nicotiana tabacum*. *Agrobacterium tumefaciens* was used to transiently express XopQ, RipB<sub>GMI1000</sub> and RipB<sub>MolK2</sub> along with either Roq1 or an empty vector (EV) control in wild-type *Nicotiana tabacum* and a *roq1* loss of function mutant. The *Agrobacterium* was infiltrated at a total OD<sub>600</sub> of 0.5 and the leaves were imaged at three days post infiltration.

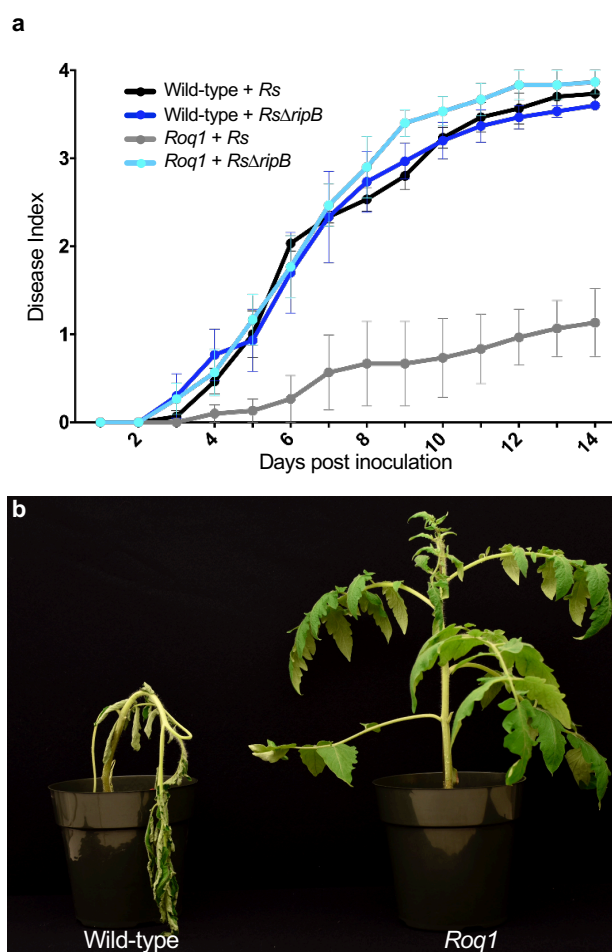

**Figure 5.**

Bacterial Wilt disease development in *Roq1* tomatoes. (a) Wild-type and *Roq1* tomatoes were infected with wild-type and RipB mutant *Ralstonia solanacearum* strain GMI1000 by soil soak inoculation. Disease symptoms were monitored over 14 days, with no wilting corresponding to a Disease Index of 0 and complete wilting corresponding to a Disease Index of 4. Error bars indicate standard error. (b) Wild-type and *Roq1* tomato plants 8 days after petiole inoculation with approximately 2,000 cells of wild-type GMI1000.

## Parsed Citations

- Boller, T., and S. Y. He. 2009. "Innate Immunity in Plants: An Arms Race between Pattern Recognition Receptors in Plants and Effectors in Microbial Pathogens." *Science* 324 (5928): 742–44.**  
Pubmed: [Author and Title](#)  
Google Scholar: [Author Only Title Only Author and Title](#)
- Brunner, Edgar, and Madan L. Puri. 2001. "Nonparametric Methods in Factorial Designs." *Statistical Papers* 42 (1): 1–52.**  
Pubmed: [Author and Title](#)  
Google Scholar: [Author Only Title Only Author and Title](#)
- Castañeda, Adriana, Joseph D. Reddy, Basma El-Yacoubi, and Dean W. Gabriel. 2005. "Mutagenesis of All Eight Avr Genes in *Xanthomonas Campestris* Pv. *Campestris* Had No Detected Effect on Pathogenicity, but One Avr Gene Affected Race Specificity." *Molecular Plant-Microbe Interactions: MPMI* 18 (12): 1306–17.**  
Pubmed: [Author and Title](#)  
Google Scholar: [Author Only Title Only Author and Title](#)
- Coupat, Bénédicte, Fanny Chaumeille-Dole, Saliou Fall, Philippe Prior, Pascal Simonet, Xavier Nesme, and Franck Bertolla. 2008. "Natural Transformation in the *Ralstonia Solanacearum* Species Complex: Number and Size of DNA That Can Be Transferred." *FEMS Microbiology Ecology* 66 (1): 14–24.**  
Pubmed: [Author and Title](#)  
Google Scholar: [Author Only Title Only Author and Title](#)
- Coutu, Catherine, James Brandle, Dan Brown, Kirk Brown, Brian Miki, John Simmonds, and Dwayne D. Hegedus. 2007. "pORE: A Modular Binary Vector Series Suited for Both Monocot and Dicot Plant Transformation." *Transgenic Research* 16 (6): 771–81.**  
Pubmed: [Author and Title](#)  
Google Scholar: [Author Only Title Only Author and Title](#)
- Dangl, Jeffery L., Diana M. Horvath, and Brian J. Staskawicz. 2013. "Pivoting the Plant Immune System from Dissection to Deployment." *Science* 341 (6147): 746–51.**  
Pubmed: [Author and Title](#)  
Google Scholar: [Author Only Title Only Author and Title](#)
- Davis, R. M., G. Miyao, K. V. Subbarao, J. J. Stapleton, and And B. J. Aegerter. 2013. "UC IPM: UC Management Guidelines - TOMATO:Diseases." 3470. UC Davis. <http://ipm.ucanr.edu/PMG/r783101611.html>.**  
Pubmed: [Author and Title](#)  
Google Scholar: [Author Only Title Only Author and Title](#)
- Denny, Tim. 2006. "Plant Pathogenic *Ralstonia* Species." In *Plant-Associated Bacteria*, edited by Samuel S. Gnanamanickam, 573–644. Dordrecht: Springer Netherlands.**  
Pubmed: [Author and Title](#)  
Google Scholar: [Author Only Title Only Author and Title](#)
- Deslandes, Laurent, and Susana Rivas. 2012. "Catch Me If You Can: Bacterial Effectors and Plant Targets." *Trends in Plant Science* 17 (11): 644–55.**  
Pubmed: [Author and Title](#)  
Google Scholar: [Author Only Title Only Author and Title](#)
- Dillon, Marcus M., Renan N. D. Almeida, Bradley Laflamme, Alexandre Martel, Bevan S. Weir, Darrell Desveaux, and David S. Guttman. 2019. "Molecular Evolution of *Pseudomonas Syringae* Type III Secreted Effector Proteins." *Frontiers in Plant Science* 10 (April): 418.**
- Ferrante, Patrizia, and Marco Scortichini. 2009. "Identification of *Pseudomonas Syringae* Pv. *Actinidia* as Causal Agent of Bacterial Canker of Yellow Kiwifruit (*Actinidia Chinensis* Planchon) in Central Italy." *Journal of Phytopathology* 157 (11-12): 768–70.**  
Pubmed: [Author and Title](#)  
Google Scholar: [Author Only Title Only Author and Title](#)
- Freeman, J. H., E. J. McAvoy, N. S. Boyd, Kinessary R., Ozores-Hampton M., H. A. Smith, Desaegeer J., J. W. Noling, and G. E. Vallad. 2018. "Tomato Production." In *Vegetable Production Handbook of Florida 2018–2019*, edited by H. A. Smith, J. H. Freeman, P. J. Dittmar, M. L. Paret, and G. E. Vallad, 349–93. Lincolnshire, IL: Vance Publishing Corporation.**  
Pubmed: [Author and Title](#)  
Google Scholar: [Author Only Title Only Author and Title](#)
- Gibson, Daniel G., Lei Young, Ray-Yuan Chuang, J. Craig Venter, Clyde A. Hutchison 3rd, and Hamilton O. Smith. 2009. "Enzymatic Assembly of DNA Molecules up to Several Hundred Kilobases." *Nature Methods* 6 (5): 343–45.**  
Pubmed: [Author and Title](#)  
Google Scholar: [Author Only Title Only Author and Title](#)
- Giska, Fabian, Malgorzata Lichocka, Marcin Piechocki, Michał Dadlez, Elmon Schmelzer, Jacek Hennig, and Magdalena Krzymowska. 2013. "Phosphorylation of HopQ1, a Type III Effector from *Pseudomonas Syringae*, Creates a Binding Site for Host 14-3-3 Proteins." *Plant Physiology* 161 (4): 2049–61.**  
Pubmed: [Author and Title](#)  
Google Scholar: [Author Only Title Only Author and Title](#)
- Grant, Sarah R., Emily J. Fisher, Jeff H. Chang, Beth M. Mole, and Jeffery L. Dangl. 2006. "Subterfuge and Manipulation: Type III**



**Effector Proteins of Phytopathogenic Bacteria." Annual Review of Microbiology 60: 425–49.**

Pubmed: [Author and Title](#)

Google Scholar: [Author Only Title Only Author and Title](#)

**Griffin, Karina, Cherie Gambley, Philip Brown, and Yujuan Li. 2017. "Copper-Tolerance in Pseudomonas Syringae Pv. Tomato and Xanthomonas Spp. and the Control of Diseases Associated with These Pathogens in Tomato and Pepper. A Systematic Literature Review." Crop Protection 96: 144–50.**

Pubmed: [Author and Title](#)

Google Scholar: [Author Only Title Only Author and Title](#)

**Gudesblat, Gustavo E., Pablo S. Torres, and Adrián A. Vojnov. 2009. "Xanthomonas Campestris Overcomes Arabidopsis Stomatal Innate Immunity through a DSF Cell-to-Cell Signal-Regulated Virulence Factor." Plant Physiology 149 (2): 1017–27.**

Pubmed: [Author and Title](#)

Google Scholar: [Author Only Title Only Author and Title](#)

**Guindon, Stéphane, Jean-François Dufayard, Vincent Lefort, Maria Anisimova, Wim Hordijk, and Olivier Gascuel. 2010. "New Algorithms and Methods to Estimate Maximum-Likelihood Phylogenies: Assessing the Performance of PhyML 3.0." Systematic Biology 59 (3): 307–21.**

Pubmed: [Author and Title](#)

Google Scholar: [Author Only Title Only Author and Title](#)

**Hann, Dagmar R., Ana Domínguez-Ferreras, Vaclav Motyka, Petre I. Dobrev, Sebastian Schornack, Anna Jehle, Georg Felix, Delphine Chinchilla, John P. Rathjen, and Thomas Boller. 2014. "The Pseudomonas Type III Effector HopQ1 Activates Cytokinin Signaling and Interferes with Plant Innate Immunity." The New Phytologist 201 (2): 585–98.**

Pubmed: [Author and Title](#)

Google Scholar: [Author Only Title Only Author and Title](#)

**Hayes, Madeline M., April M. MacIntyre, and Caitilyn Allen. 2017. "Complete Genome Sequences of the Plant Pathogens Ralstonia Solanacearum Type Strain K60 and R. Solanacearum Race 3 Biovar 2 Strain UW551." Genome Announcements 5 (40). <https://doi.org/10.1128/genomeA.01088-17>.**

Pubmed: [Author and Title](#)

Google Scholar: [Author Only Title Only Author and Title](#)

**Horsfall, JG, and Barrat, RW. 1945. "An Improved Grading System for Measuring Plant Diseases." Phytopathology 35: 655.**

Pubmed: [Author and Title](#)

Google Scholar: [Author Only Title Only Author and Title](#)

**Jones, Jonathan D. G., and Jeffery L. Dangl. 2006. "The Plant Immune System." Nature 444 (7117): 323–29.**

Pubmed: [Author and Title](#)

Google Scholar: [Author Only Title Only Author and Title](#)

**Jones, Jonathan D. G., Russell E. Vance, and Jeffery L. Dangl. 2016. "Intracellular Innate Immune Surveillance Devices in Plants and Animals." Science 354 (6316). <https://doi.org/10.1126/science.aaf6395>.**

Pubmed: [Author and Title](#)

Google Scholar: [Author Only Title Only Author and Title](#)

**Jones, Jonathan D. G., Kamil Witek, Walter Verweij, Florian Jupe, David Cooke, Stephen Dorling, Laurence Tomlinson, Matthew Smoker, Sara Perkins, and Simon Foster. 2014. "Elevating Crop Disease Resistance with Cloned Genes." Philosophical Transactions of the Royal Society of London. Series B, Biological Sciences 369 (1639): 20130087.**

Pubmed: [Author and Title](#)

Google Scholar: [Author Only Title Only Author and Title](#)

**Kapos, Paul, Karen Thulasi Devendrakumar, and Xin Li. 2019. "Plant NLRs: From Discovery to Application." Plant Science: An International Journal of Experimental Plant Biology 279 (February): 3–18.**

Pubmed: [Author and Title](#)

Google Scholar: [Author Only Title Only Author and Title](#)

**Kay, Sabine, and Ulla Bonas. 2009. "How Xanthomonas Type III Effectors Manipulate the Host Plant." Current Opinion in Microbiology 12 (1): 37–43.**

Pubmed: [Author and Title](#)

Google Scholar: [Author Only Title Only Author and Title](#)

**Kennelly, Megan M., Francisco M. Cazorla, Antonio de Vicente, Cayo Ramos, and George W. Sundin. 2007. "Pseudomonas Syringae Diseases of Fruit Trees: Progress Toward Understanding and Control." Plant Disease 91 (1): 4–17.**

Pubmed: [Author and Title](#)

Google Scholar: [Author Only Title Only Author and Title](#)

**Khokhani, Devanshi, Tuan Minh Tran, Tiffany M. Lowe-Power, and Caitilyn Allen. 2018. "Plant Assays for Quantifying Ralstonia Solanacearum Virulence." BIO-PROTOCOL 8 (18). <https://bio-protocol.org/pdf/bio-protocol3028.pdf>.**

Pubmed: [Author and Title](#)

Google Scholar: [Author Only Title Only Author and Title](#)

**Kunwar, Sanju, Fanny Iriarte, Qiurong Fan, Eduardo Evaristo da Silva, Laura Ritchie, Nghi Song Nguyen, Joshua H. Freeman, et al. 2018. "Transgenic Expression of EFR and Bs2 Genes for Field Management of Bacterial Wilt and Bacterial Spot of Tomato."**

**Phytopathology 108 (12): 1402–11.**

Pubmed: [Author and Title](#)

Google Scholar: [Author Only Title Only Author and Title](#)

**Li, Wei, Koste A. Yadeta, James Mitch Elmore, and Gitta Coaker. 2013. "The Pseudomonas Syringae Effector HopQ1 Promotes Bacterial Virulence and Interacts with Tomato 14-3-3 Proteins in a Phosphorylation-Dependent Manner." Plant Physiology 161 (4): 2062–74.**

Pubmed: [Author and Title](#)

Google Scholar: [Author Only Title Only Author and Title](#)

**Li, Xin, Paul Kapos, and Yuelin Zhang. 2015. "NLRs in Plants." Current Opinion in Immunology 32 (February): 114–21.**

Pubmed: [Author and Title](#)

Google Scholar: [Author Only Title Only Author and Title](#)

**Li, Zefeng, Sanling Wu, Xuefei Bai, Yun Liu, Jianfei Lu, Yong Liu, Bingguang Xiao, Xiuping Lu, and Longjiang Fan. 2011. "Genome Sequence of the Tobacco Bacterial Wilt Pathogen Ralstonia Solanacearum." Journal of Bacteriology 193 (21): 6088–89.**

Pubmed: [Author and Title](#)

Google Scholar: [Author Only Title Only Author and Title](#)

**Millington, Annett, Lavanya Babujee, and Caitlyn Allen. 2011. "Ralstonia Solanacearum Extracellular Polysaccharide Is a Specific Elicitor of Defense Responses in Wilt-Resistant Tomato Plants." PloS One 6 (1): e15853.**

Pubmed: [Author and Title](#)

Google Scholar: [Author Only Title Only Author and Title](#)

**Nakano, Masahito, and Takafumi Mukaiyama. 2019. "The Type III Effector RipB from Ralstonia Solanacearum RS1000 Acts as a Major Avirulence Factor in Nicotiana Benthamiana and Other Nicotiana Species." Molecular Plant Pathology, June. <https://doi.org/10.1111/mp.12824>.**

Pubmed: [Author and Title](#)

Google Scholar: [Author Only Title Only Author and Title](#)

**Peeters, Nemo, Sébastien Carrère, Maria Anisimova, Laure Plener, Anne-Claire Cazalé, and Stéphane Genin. 2013. "Repertoire, Unified Nomenclature and Evolution of the Type III Effector Gene Set in the Ralstonia Solanacearum Species Complex." BMC Genomics 14 (December): 859.**

**Pontes, Nadson de Carvalho, Abadia Dos Reis Nascimento, Adelmo Golynski, Luiz Antonio Maffia, José Rogério de Oliveira, and Alice Maria Quezado-Duval. 2016. "Intervals and Number of Applications of Acibenzolar-S-Methyl for the Control of Bacterial Spot on Processing Tomato." Plant Disease 100 (10): 2126–33.**

Pubmed: [Author and Title](#)

Google Scholar: [Author Only Title Only Author and Title](#)

**Potnis, Neha, Sujan Timilsina, Amanda Strayer, Deepak Shantharaj, Jeri D. Barak, Mathews L. Paret, Gary E. Vallad, and Jeffrey B. Jones. 2015. "Bacterial Spot of Tomato and Pepper: Diverse Xanthomonas Species with a Wide Variety of Virulence Factors Posing a Worldwide Challenge." Molecular Plant Pathology 16 (9): 907–20.**

Pubmed: [Author and Title](#)

Google Scholar: [Author Only Title Only Author and Title](#)

**Qi, Tiancong, Kyungyong Seong, Daniela P. T. Thomazella, Joonyoung Ryan Kim, Julie Pham, Eunyoung Seo, Myeong-Je Cho, Alex Schultink, and Brian J. Staskawicz. 2018. "NRG1 Functions Downstream of EDS1 to Regulate TIR-NLR-Mediated Plant Immunity in Nicotiana Benthamiana." Proceedings of the National Academy of Sciences of the United States of America 115 (46): E10979–87.**

Pubmed: [Author and Title](#)

Google Scholar: [Author Only Title Only Author and Title](#)

**Rivard, C. L., S. O'Connell, M. M. Peet, R. M. Welker, and F. J. Louws. 2012. "Grafting Tomato to Manage Bacterial Wilt Caused by Ralstonia Solanacearum in the Southeastern United States." Plant Disease 96 (7): 973–78.**

Pubmed: [Author and Title](#)

Google Scholar: [Author Only Title Only Author and Title](#)

**Ryan, Robert P., Frank-Jörg Vorhölter, Neha Potnis, Jeffrey B. Jones, Marie-Anne Van Sluys, Adam J. Bogdanove, and J. Maxwell Dow. 2011. "Pathogenomics of Xanthomonas: Understanding Bacterium-Plant Interactions." Nature Reviews. Microbiology 9 (5): 344–55.**

Pubmed: [Author and Title](#)

Google Scholar: [Author Only Title Only Author and Title](#)

**Sabbagh, Cyrus Raja Rubenstein, Sébastien Carrère, Fabien Lonjon, Fabienne Vailleau, Alberto P. Macho, Stéphane Genin, and Nemo Peeters. 2019. "Pangenomic Type III Effector Database of the Plant Pathogenic Ralstonia Spp." e27726v1. PeerJ Preprints. <https://doi.org/10.7287/peerj.preprints.27726v1>.**

Pubmed: [Author and Title](#)

Google Scholar: [Author Only Title Only Author and Title](#)

**Schultink, Alex, Tiancong Qi, Arielle Lee, Adam D. Steinbrenner, and Brian Staskawicz. 2017. "Roq1 Mediates Recognition of the Xanthomonas and Pseudomonas Effector Proteins XopQ and HopQ1." The Plant Journal: For Cell and Molecular Biology 92 (5): 787–95.**

Pubmed: [Author and Title](#)

Google Scholar: [Author Only Title Only Author and Title](#)

**Schwartz, Allison R., Neha Potnis, Sujan Timilsina, Mark Wilson, José Patané, Joaquim Martins Jr, Gerald V. Minsavage, et al. 2015. "Phylogenomics of Xanthomonas Field Strains Infecting Pepper and Tomato Reveals Diversity in Effector Repertoires and Identifies Determinants of Host Specificity." *Frontiers in Microbiology* 6 (June): 535.**

**Shah, D. A., and L. V. Madden. 2004. "Nonparametric Analysis of Ordinal Data in Designed Factorial Experiments." *Phytopathology* 94 (1): 33–43.**

Pubmed: [Author and Title](#)

Google Scholar: [Author Only](#) [Title Only](#) [Author and Title](#)

**Sharma, Sadikshya, and Krishna Bhattarai. 2019. "Progress in Developing Bacterial Spot Resistance in Tomato." *Agronomy* 9 (1): 26.**

**Sievers, Fabian, Andreas Wilm, David Dineen, Toby J. Gibson, Kevin Karplus, Weizhong Li, Rodrigo Lopez, et al. 2011. "Fast, Scalable Generation of High-Quality Protein Multiple Sequence Alignments Using Clustal Omega." *Molecular Systems Biology* 7 (October): 539.**

**Sohn, Kee Hoon, Cécile Segonzac, Ghanasyam Rallapalli, Panagiotis F. Sarris, Joo Yong Woo, Simon J. Williams, Toby E. Newman, Kyung Hee Paek, Bostjan Kobe, and Jonathan D. G. Jones. 2014. "The Nuclear Immune Receptor RPS4 Is Required for RRS1SLH1-Dependent Constitutive Defense Activation in Arabidopsis Thaliana." *PLoS Genetics* 10 (10): e1004655.**

Pubmed: [Author and Title](#)

Google Scholar: [Author Only](#) [Title Only](#) [Author and Title](#)

**Teper, Doron, Dor Salomon, Sukumaran Sunitha, Jung-Gun Kim, Mary Beth Mudgett, and Guido Sessa. 2014. "Xanthomonas Euvesicatoria Type III Effector XopQ Interacts with Tomato and Pepper 14-3-3 Isoforms to Suppress Effector-Triggered Immunity." *The Plant Journal: For Cell and Molecular Biology* 77 (2): 297–309.**

Pubmed: [Author and Title](#)

Google Scholar: [Author Only](#) [Title Only](#) [Author and Title](#)

**Vasse, J., P. Frey, and A. Trigalet. 1995. "Microscopic Studies of Intercellular Infection and Protoxylem Invasion of Tomato Roots by Pseudomonas Solanacearum." <https://pubag.nal.usda.gov/catalog/1443867>.**

Pubmed: [Author and Title](#)

Google Scholar: [Author Only](#) [Title Only](#) [Author and Title](#)

**Vincelli, Paul. 2016. "Genetic Engineering and Sustainable Crop Disease Management: Opportunities for Case-by-Case Decision-Making." *Sustainability: Science Practice and Policy* 8 (5): 495.**

**Xin, Xiu-Fang, Brian Kvitko, and Sheng Yang He. 2018. "Pseudomonas Syringae: What It Takes to Be a Pathogen." *Nature Reviews Microbiology* 16 (5): 316–28.**

Pubmed: [Author and Title](#)

Google Scholar: [Author Only](#) [Title Only](#) [Author and Title](#)

**Yuliar, Yanetri Asi Nion, and Koki Toyota. 2015. "Recent Trends in Control Methods for Bacterial Wilt Diseases Caused by Ralstonia Solanacearum." *Microbes and Environments / JSME* 30 (1): 1–11.**

Pubmed: [Author and Title](#)

Google Scholar: [Author Only](#) [Title Only](#) [Author and Title](#)

**Zipfel, Cyril. 2014. "Plant Pattern-Recognition Receptors." *Trends in Immunology* 35 (7): 345–51.**

Pubmed: [Author and Title](#)

Google Scholar: [Author Only](#) [Title Only](#) [Author and Title](#)
